# Supplementary material for: Switchable superlyophobic zeolitic imidazolate framework-8 film-coated stainless-steel meshes for selective oil–water emulsion separation with high flux
Source: Royal Society of Chemistry journal article supplement (doi:10.1039/d0nj02517h), 2020-01-01
Supplement: d0nj02517h1.pdf [file d0nj02517h1.pdf]

Electronic Supplementary Information (ESI) for New Journal of Chemistry.

## Supplementary Information for

# Switchable Superlyophobic Zeolitic Imidazolate Framework-8 Film-Coated Stainless-Steel Meshes for Selective Oil–Water Emulsion Separation with High Flux

Xin Gao,<sup>a</sup> Qiang Ma,<sup>a</sup> Zhengwei Jin,<sup>b</sup> Pei Nian<sup>a</sup> and Zheng Wang\*<sup>a</sup>

<sup>a</sup> *State Key Laboratory of High-efficiency Utilization of Coal and Green Chemical Engineering, College of Chemistry and Chemical Engineering, National Demonstration Center for Experimental Chemistry Education, Ningxia University, Yinchuan 750021, People's Republic of China.*

*E-mail: wzhen@nxu.edu.cn*

<sup>b</sup> *Ningxia Coal Industry Co. Ltd., China Energy Group, Yinchuan 750411, People's Republic of China.*

## **CONTENTS:**

**S1:** Pore sizes and underwater oil contact angles of neat SSMs and ZFCM-1.

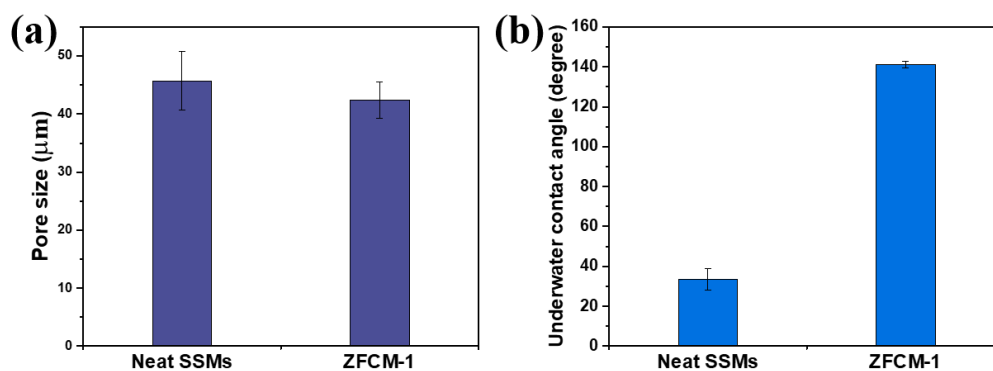

Fig. S1 (a) Pore size and (b) underwater oil contact angles of neat SSMs and Z-1.

ZFCM-1 was prepared by 1 h of crystallization on seeded SSMs. Neat SSMs and ZFCM-1 had similar pore sizes of  $\sim 43 \mu\text{m}$ . However, the UOCAs of the two membranes were different. After coating thin ZIF-8 film onto the SSMs, the UOCA increased from  $33.4 \pm 5.5^\circ$  to  $141.1 \pm 1.7^\circ$ , proving that ZIF-8 enhanced the UOCA of the membrane.
